# Supplementary material for: Molecular safeguarding of CRISPR gene drive experiments
Source: eLife. 2019 Jan 22;8:e41439. doi: 10.7554/eLife.41439 (PMC6358215; doi:10.7554/eLife.41439)
Supplement: Supplementary file 2. [file elife-41439-supp2.xlsx]

## Sheet: Data Set S1
Data Set S1
Glossary			Fisher's exact test is used for all statistical comparisons, *p<0.05, **p<0.01, ***p<0.001									Phenotype	Genotypes
R = dsRed phenotype				D = homing drive allele, with Cas9 and dsRed inserted in a disrupted EGFP gene								R	D/D, D/r2
G = EGFP phenotype				r1 = resistance allele, preserves target gene function								RG	D/+, D/r1
m = mosaic for EGFP phenotype				r2 = resistance allele, disrupts target gene function								WT	r2/r2
WT = wild type				r2m = mosaic for r2 allele								G	+/+, +/r1, +/r2, r1/r1, r1/r2, +/r2m, r1/r2m
♀ = female				EGFP = target allele								Rm	D/r2m
♂ = male				all listed progeny are derived from a single gene drive insect								m	r2/r2m, r2m/r2m
Site B Drive (chromosome 2L)
Progeny of D/EGFP females and EGFP/EGFP males															Rate	Stdev								p-value	Comparison
Insect	RG♂	Rm♂	R♂	G♂	m♂	WT♂	RG♀	Rm♀	R♀	G♀	m♀	WT♀	Total		0.757683	0.0147316	Drive Inheritance Rate							<0.0001***	Drive inheritance compared to Mendelian expectation
#1		1	8		1	2	1	2	16	2	2	2	37		0.515366	0.0294632	Drive Conversion Rate							<0.0001***	Embryo r2 allele formation rate in flies inheriting a drive allele compared to flies not inheriting a drive allele
#2	1	3	18	1	3	8	1	2	21	1		7	66		0.882995	0.0126956	Embryo r2 Allele Formation Rate in Flies Inheriting a Drive Allele
#3	1	3	9		1	2		3	16		2	2	39		0.0920437	0.0114183	Embryo r2 Allele Mosaicism Rate in Flies Inheriting a Drive Allele
#4		2	12	2	3	3		4	16	2	1	2	47		0.663415	0.0330037	Embryo r2 Allele Formation Rate in Flies Not Inheriting a Drive Allele
#5	2	2	20			9	2	3	31	1	1	3	74		0.24878	0.0301936	Embryo r2 Allele Mosaicism Rate in Flies Not Inheriting a Drive Allele
#6		1	39	2	3	12		2	49		1	13	122
#7		6	26	1	5	8	1	2	37		4	6	96
#8	2	2	19		2	6		2	11	1	2	4	51
#9		3	16		1	7	1	3	22	1	4	2	60
#10	1	2	24	1	1	1	1		18	1	2	2	54
#11	1	3	16	1	2	10		2	21		1	6	63
#12	1	1	21	1	2	3		2	24		1	6	62
#13		1	28		1	6		2	28		5	4	75
total	9	30	256	9	25	77	7	29	310	9	26	59	846
Progeny of D/EGFP males and EGFP/EGFP females															Rate	Stdev								p-value	Comparison
Insect	RG♂	Rm♂	R♂	G♂	m♂	WT♂	RG♀	Rm♀	R♀	G♀	m♀	WT♀	Total		0.685217	0.0136953	Drive Inheritance Rate							<0.0001***	Drive inheritance compared to Mendelian expectation
#1	18			5			17			6			46		0.370435	0.0273905	Drive Conversion Rate
#2	18			14			25			11			68
#3	16			5			19			11			51
#4	46			16			44			15			121
#5	24			15			23			8			70
#6	24			13			25			12			74
#7	18			6			16			5			45
#8	17			9			29			14			69
#9	25			15			26			8			74
#10	26			12			24			12			74
#11	25			12			26			18			81
#12	21			20			29			9			79
#13	31			16			31			9			87
#14	17			18			38			10			83
#15	21			15			27			11			74
#16	23			4			19			8			54
total	370	0	0	195	0	0	418	0	0	167	0	0	1150

## Sheet: Data Set S2
Data Set S2
Glossary			Fisher's exact test is used for all statistical comparisons, *p<0.05, **p<0.01, ***p<0.001									Phenotype	Genotypes
R = dsRed phenotype				D = homing drive allele, with Cas9 and dsRed inserted in a disrupted EGFP gene								R	D/D, D/r2
G = EGFP phenotype				r1 = resistance allele, preserves target gene function								RG	D/+, D/r1
m = mosaic for EGFP phenotype				r2 = resistance allele, disrupts target gene function								WT	r2/r2
WT = wild type				r2m = mosaic for r2 allele								G	+/+, +/r1, +/r2, r1/r1, r1/r2, +/r2m, r1/r2m
♀ = female				EGFP = target allele								Rm	D/r2m
♂ = male				all listed progeny are derived from a single gene drive insect								m	r2/r2m, r2m/r2m
Site E Drive (chromosome 3R)
Progeny of D/EGFP females and EGFP/EGFP males															Rate	Stdev								p-value	Comparison
Insect	RG♂	Rm♂	R♂	G♂	m♂	WT♂	RG♀	Rm♀	R♀	G♀	m♀	WT♀	Total		0.771084	0.0230579	Drive Inheritance Rate							<0.0001***	Drive inheritance compared to Mendelian expectation
#1	1	2	20			5	1		17		3	4	53		0.542169	0.0461158	Drive Conversion Rate							0.3883	Embryo r2 allele formation rate in flies inheriting a drive allele compared to flies not inheriting a drive allele
#2			10			7	1	1	17			2	38		0.90625	0.0182175	Embryo r2 Allele Formation Rate in Flies Inheriting a Drive Allele
#3	1	2	39	0	0	16	3	2	45	0	2	8	118		0.0507812	0.0137219	Embryo r2 Allele Mosaicism Rate in Flies Inheriting a Drive Allele
#4	3		19		2	6	1	4	21		1	7	64		0.868421	0.038775	Embryo r2 Allele Formation Rate in Flies Not Inheriting a Drive Allele
#5		2	24		1	6			20	1		5	59		0.118421	0.0370628	Embryo r2 Allele Mosaicism Rate in Flies Not Inheriting a Drive Allele
total	5	6	112	0	3	40	6	7	120	1	6	26	332
Progeny of D/EGFP males and EGFP/EGFP females															Rate	Stdev								p-value	Comparison
Insect	RG♂	Rm♂	R♂	G♂	m♂	WT♂	RG♀	Rm♀	R♀	G♀	m♀	WT♀	Total		0.727494	0.0219625	Drive Inheritance Rate							<0.0001***	Drive inheritance compared to Mendelian expectation
#1	26			8			20			8			62		0.454988	0.043925	Drive Conversion Rate
#2	16			6			18			5			45
#3	11			7			11			6			35
#4	28			9			25			11			73
#5	19			7			18			3			47
#6	35			12			24			5			76
#7	25			11			23			14			73
total	160	0	0	60	0	0	139	0	0	52	0	0	411

## Sheet: Data Set S3
Data Set S3
Glossary			Fisher's exact test is used for all statistical comparisons, *p<0.05, **p<0.01, ***p<0.001									Phenotype	Genotypes
R = dsRed phenotype				D = homing drive allele, with Cas9 and dsRed inserted in a disrupted EGFP gene								R	D/D, D/r2
G = EGFP phenotype				r1 = resistance allele, preserves target gene function								RG	D/+, D/r1
m = mosaic for EGFP phenotype				r2 = resistance allele, disrupts target gene function								WT	r2/r2
WT = wild type				r2m = mosaic for r2 allele								G	+/+, +/r1, +/r2, r1/r1, r1/r2, +/r2m, r1/r2m
♀ = female				EGFP = target allele								Rm	D/r2m
♂ = male				all listed progeny are derived from a single gene drive insect								m	r2/r2m, r2m/r2m
Site Y Drive (chromosome X)
Progeny of D/EGFP females and EGFP males												Rate	Stdev								p-value	Comparison
Insect	R♂	G♂	WT♂	RG♀	Rm♀	R♀	G♀	m♀	WT♀	Total		0.764766	0.013535	Drive Inheritance Rate							<0.0001***	Drive inheritance compared to Mendelian expectation
#1	25		9	3	12	23	8	3	5	88		0.529532	0.02707	Drive Conversion Rate							<0.0001***	Embryo r2 allele formation rate in flies inheriting a drive allele compared to flies not inheriting a drive allele
#2	40	1	13	4	14	11	9	5	2	99		0.217039	0.0185659	r2 Inheritance Rate (from male progeny)							0.0003***	Embryo r2 allele formation rate in flies inheriting a drive allele compared to site B drive
#3	38		17	1	4	45		3	13	121		0.434077	0.0371317	Germline r2 Formation Rate (from male progeny)							<0.0001***	Embryo r2 allele formation rate in flies inheriting a drive allele compared to yellow drive
#4	41		10	1	4	38	2		3	99		0.00811359	0.0040403	r1 or + Inheritance Rate (from male progeny)
#5	42		9	1	2	24	2	1	6	87		0.0162272	0.00808061	Germline r1 Formation Rate plus wild type rate (from male progeny)
#6	48		8		2	24		1	7	90		0.796748	0.0209491	Embryo r2 Allele Formation Rate in Flies Inheriting a Drive Allele
#7	28		12	1	4	28	2	3	8	86		0.162602	0.0192095	Embryo r2 Allele Mosaicism Rate in Flies Inheriting a Drive Allele
#8	32	1	8	1	5	41	1	2	5	96		0.491667	0.0456372	Embryo r2 Allele Formation Rate in Flies Not Inheriting a Drive Allele
#9	28	1	9	2	8	20	5	3	6	82		0.216667	0.0376079	Embryo r2 Allele Mosaicism Rate in Flies Not Inheriting a Drive Allele
#10	20	1	2	1	2	12	5	2		45
#11	40		10		3	28	1	3	4	89
total	382	4	107	15	60	294	35	26	59	982

## Sheet: Data Set S4
Data Set S4
Glossary			Fisher's exact test is used for all statistical comparisons, *p<0.05, **p<0.01, ***p<0.001									Phenotype	Male genotypes	Female genotypes
R = dsRed phenotype				D = homing drive allele, with Cas9 and dsRed inserted in a disrupted yellow gene								Ry	D	D/D, D/r2
y = yellow phenotype				r1 = resistance allele, preserves target gene function								R	none	D/+, D/r1
m = mosaic for yellow phenotype				r2 = resistance allele, disrupts target gene function								y	r2	r2/r2
WT = wild type				r2m = mosaic for r2 allele								WT	+, r1	+/+, +/r1, +/r2, r1/r1, r1/r2, +/r2m, r1/r2m
♀ = female				+ = wild type yellow allele								Rm	none	D/r2m
♂ = male				all listed progeny are derived from a single gene drive insect								m	r2m	r2/r2m, r2m/r2m
Split Drive
Progeny of D/+ females with Cas9-EGFP and + males												Rate	Stdev								p-value	Comparison
Insect	Ry♂	WT♂	y♂	R♀	Rm♀	Ry♀	WT♀	m♀	y♀	Total		0.868807	0.00891855	Drive Inheritance Rate							<0.0001***	Drive inheritance compared to Mendelian expectation
(D/+ females that were progeny of crosses between D males and Cas9-EGFP females)												0.737613	0.0178371	Drive Conversion Rate							<0.0001***	Drive inheritance compared to standard yellow drive (which uses the same gRNA, homology arms, and Cas9, but with Cas9 integrated into the driving element)
#1	16					8	3	1		28		0.113009	0.0114769	r2 Inheritance Rate (from male progeny)							<0.0001***	Embryo r2 allele formation rate in flies inheriting a drive allele compared to flies not inheriting a drive allele
#2	27	1	2		5	9		3	3	50		0.226018	0.0229538	Germline r2 Formation Rate (from male progeny)							0.0499*	Embryo r2 allele formation rate in flies inheriting a drive allele compared to site Y synthetic target drive
#3	13		1			11				25		0.00262812	0.00185592	r1 or + Inheritance Rate (from male progeny)							<0.0001***	Embryo r2 allele formation rate in flies inheriting a drive allele compared to standard yellow drive
#4	36		6			31			5	78		0.00525624	0.00371184	Germline r1 Formation Rate plus wild type rate (from male progeny)
#5	36		3	1	4	14			2	60		0.73951	0.0183514	Embryo r2 Allele Formation Rate in Flies Inheriting a Drive Allele
#6	29		6		3	24		3	1	66		0.225524	0.0174744	Embryo r2 Allele Mosaicism Rate in Flies Inheriting a Drive Allele
#7	24		3		3	22		6	6	64		0.5	0.05	Embryo r2 Allele Formation Rate in Flies Not Inheriting a Drive Allele
#8	20		2		1	14		3	2	42		0.42	0.0493559	Embryo r2 Allele Mosaicism Rate in Flies Not Inheriting a Drive Allele
#9	34		3	2	1	25		1	3	69
#10	62		7	3	8	35		4	2	121
#11	54		6		10	28	1	2	3	104
#12	41		8		17	34		2	5	107
#13	44		9		15	21		5	4	98
#14	53		6	4	7	28		2	3	103
(D/+ females that were progeny of crosses between D/D females and Cas9-EGFP males)
#15	39		6	4	16	38		2	5	110
#16	45		7	2	15	33	2	2	1	107
#17	44		5	3	9	22		2	3	88
#18	56	1	6	1	15	26	2	4	2	113
total	673	2	86	20	129	423	8	42	50	1433
Progeny of Rm females (likely mostly D/+ in the initial germline) without Cas9-EGFP (which were progeny of D/+ females with Cas9-EGFP and + males) and + males
Insect	Ry♂	WT♂	y♂	R♀	Rm♀	Ry♀	WT♀	m♀	y♀	Total		Rate	Stdev								p-value	Comparison
#1	31	3	5	30			12			81		0.769627	0.0106815	Drive Inheritance Rate							<0.0001***	Drive inheritance compared to Mendelian expectation
#2	25	6	5	34			19			89		0.539254	0.0213629	Drive Conversion Rate							<0.0001***	Drive inheritance compared to complete split drive cross
#3	34		8	41			8			91		0.146703	0.01298	r2 Inheritance Rate (from male progeny)
#4	38	1		46			7			92		0.293405	0.02596	Germline r2 Formation Rate (from male progeny)
#5	47	7	8	44			15			121		0.0672948	0.00919112	r1 or + Inheritance Rate (from male progeny)
#6	46		14	41			11			112		0.13459	0.0183822	Germline r1 Formation Rate plus wild type rate (from male progeny)
#7	26	3	9	36			19			93		0	0	Embryo r2 Allele Formation Rate
#8	41	7	4	44			13			109
#9	61	4	3	56			14			138
#10	32	4	11	46			23			116
#11	31	6	6	27			12			82
#12	42		10	41			9			102
#13	49	4	4	41			11			109
#14	37	5	14	44			16			116
#15	44		8	41			10			103
total	584	50	109	612	0	0	199	0	0	1554
additional non-driving insect
#1	32		37	36			23			128
Progeny of Ry females (likely D/r2) without Cas9-EGFP (which were progeny of D/+ females with Cas9-EGFP and + males) and + males
Insect	Ry♂	WT♂	y♂	R♀	Rm♀	Ry♀	WT♀	m♀	y♀	Total		Rate	Stdev								p-value	Comparison
#1	25		17	21			29			92		0.510571	0.0162528	Drive Inheritance Rate							0.679	Drive inheritance compared to Mendelian expectation
#2	17		18	20			19			74		0.481799	0.0231219	r2 Inheritance Rate (from male progeny)
#3	28		24	31			27			110		0	0	Embryo r2 Allele Formation Rate
#4	30		27	36			38			131
#5	36		33	35			28			132
#6	23		29	30			27			109
#7	34		21	26			31			112
#8	30		33	25			30			118
#9	19		23	17			9			68
total	242	0	225	241	0	0	238	0	0	946
additional driving insects
#1	52	4	4	50			16			126
#2	34	9	9	33			28			113
Progeny of R females (likely D/r1) without Cas9-EGFP (which were progeny of D/+ females with Cas9-EGFP and + males) and + males
Insect	Ry♂	WT♂	y♂	R♀	Rm♀	Ry♀	WT♀	m♀	y♀	Total		Rate	Stdev								p-value	Comparison
#1	18	28		18			26			90		0.463918	0.0358043	Drive Inheritance Rate							0.54	Drive inheritance compared to Mendelian expectation
#2	25	28		29			22			104		0	0	r2 Inheritance Rate (from male progeny)
total	43	56	0	47	0	0	48	0	0	194		0	0	Embryo r2 Allele Formation Rate
Progeny of D/+ females without Cas9-EGFP (which were progeny of females heterozygous for Cas9-EGFP and + males) and + males
Insect	Ry♂	WT♂	y♂	R♀	Rm♀	Ry♀	WT♀	m♀	y♀	Total		Rate	Stdev								p-value	Comparison
#1	17	7	1	19			6			50		0.688242	0.0152139	Drive Inheritance Rate							<0.0001***	Drive inheritance compared to Mendelian expectation
#2	22	9	1	30			22			84		0.376483	0.0304277	Drive Conversion Rate							<0.0001***	Drive inheritance compared to complete split drive cross
#3	46	9	6	42			23			126		0.0581655	0.0110705	r2 Inheritance Rate (from male progeny)
#4	23	8	3	22			11			67		0.116331	0.022141	Germline r2 Formation Rate (from male progeny)
#5	25	7	2	27			12			73		0.228188	0.0198494	r1 or + Inheritance Rate (from male progeny)
#6	37	14	5	39			22			117		0.456376	0.0396989	Germline r1 Formation Rate plus wild type rate (from male progeny)
#7	32	19	1	26			22			100		0	0	Embryo r2 Allele Formation Rate
#8	36	9	1	24			18			88
#9	45	8	4	51			8			116
#10	36	12	2	39			17			106
total	319	102	26	319	0	0	161	0	0	927
